# Supplementary material
Source: MDPI journal article supplement (https://www.mdpi.com/2410-3888/7/3/118)
Supplement: s1 [file s1]

**Table S1.** Feed formula of artificial diets.

| Ingredient                  | Percentage (%) |
|-----------------------------|----------------|
| White fish meal             | 71             |
| Corn starch                 | 8              |
| Fish oil                    | 10             |
| Vitamin premix <sup>1</sup> | 2              |
| Mineral premix <sup>2</sup> | 2              |
| Microcrystalline cellulose  | 2              |
| Carboxymethyl cellulose     | 2              |
| Yeast extract powder        | 3              |
| Total                       | 100            |

Note: 1. Vitamin premix (per kg of diet): vitamin B1 (thiamin), 30 mg; vitamin B2 (riboflavin), 60 mg; vitamin B6, 30 mg; vitamin B12, 0.22 mg; vitamin D3, 5mg; vitamin E 160 mg; vitamin K3 50 mg; folic acid, 20 mg; biotin, 2.5 mg; pantothenic acid calcium, 100 mg; ascorbic acid (35%), 250 mg; niacinamide, 200 mg; powdered rice hulls, 999 mg.

2. Mineral premix (per kg of diet): MnSO<sub>4</sub>, 10 mg; MgSO<sub>4</sub>, 10 mg; KCl, 95 mg; NaCl, 165 mg; ZnSO<sub>4</sub>, 20 mg; KI, 1 mg; CuSO<sub>4</sub>, 12.5 mg; FeSO<sub>4</sub>, 105 mg; Na<sub>2</sub>SeO<sub>3</sub>, 0.1 mg; Co, 1.5 mg.
